# Supplementary material
Source: HighWire-hosted journal article supplement (https://bmjopen.bmj.com/content/12/4/e053455)
Supplement: inline-supplementary-material-1 [file inline-supplementary-material-1.pdf]

**Appendix 1: Search strings**

| Database and date                                                   | Yield | duplicates | Search string used                                                                                                                                                                                                                                                                                                                                                   |
|---------------------------------------------------------------------|-------|------------|----------------------------------------------------------------------------------------------------------------------------------------------------------------------------------------------------------------------------------------------------------------------------------------------------------------------------------------------------------------------|
| PubMed<br>11/12/20                                                  | 435   | 6          | "Community Health Workers"[Mesh] OR "community health volunteers" OR "lay health workers" ) AND "Hypertension"[Mesh]) OR "Cardiovascular Diseases"[Mesh]) OR "Blood Pressure"[Mesh]) AND "Developing Countries"[Mesh] OR "low and middle income countries") AND ("Randomized Controlled Trials as Topic"[Mesh] OR "Non-Randomized Controlled Trials as Topic"[Mesh]) |
| CINAHL<br>11/12/20                                                  | 151   | 3          | "Community Health Workers"[Mesh] OR "community health volunteers" OR "lay health workers" ) AND "Hypertension"[Mesh]) OR "Cardiovascular Diseases"[Mesh]) OR "Blood Pressure"[Mesh]) AND "Developing Countries"[Mesh] OR "low and middle income countries") AND ("Randomized Controlled Trials as Topic"[Mesh] OR "Non-Randomized Controlled Trials as Topic"[Mesh]) |
| PsycINFO<br>20/12/20                                                | 34    | 0          | "Community Health Workers"[Mesh] OR "community health volunteers" OR "lay health workers" ) AND "Hypertension"[Mesh]) OR "Cardiovascular Diseases"[Mesh]) OR "Blood Pressure"[Mesh]) AND "Developing Countries"[Mesh] OR "low and middle income countries") AND ("Randomized Controlled Trials as Topic"[Mesh] OR "Non-Randomized Controlled Trials as Topic"[Mesh]) |
| Cochrane<br>20/12/20                                                | 198   | 10         | Community health workers [Mesh] and hypertension                                                                                                                                                                                                                                                                                                                     |
| EMBASE<br>20/12/20                                                  | 116   | 1          | ('community'/exp OR community) AND ('health'/exp OR health) AND ('worker'/exp OR worker) AND ('cardiovascular'/exp OR cardiovascular) AND ('diseases'/exp OR diseases) AND ('intervention'/exp OR intervention)                                                                                                                                                      |
| Total                                                               | 934   | 20         |                                                                                                                                                                                                                                                                                                                                                                      |
| Other sources                                                       | 26    |            |                                                                                                                                                                                                                                                                                                                                                                      |
| 52 duplicates removed by endnote                                    |       |            |                                                                                                                                                                                                                                                                                                                                                                      |
| A further 30 duplicates removed by covidence to give a total of 858 |       |            |                                                                                                                                                                                                                                                                                                                                                                      |
